# Supplementary material
Source: MDPI journal article supplement (https://www.mdpi.com/2311-7524/8/12/1172)
Supplement: s1 [file s1 › horticulturae-1985289-supplementary.pdf]

**Table S1.** Phenotypic evaluation of the resistance to *P. xanthii* race 2 under natural conditions of infection. Values are mean (n=12)  $\pm$  SE

| <b>accession</b>              | <b>Disease score</b>  | <b>Reaction classification</b> |
|-------------------------------|-----------------------|--------------------------------|
| TUN-2                         | 2.83 $\pm$ 1.6        | S                              |
| TUN-3                         | 1.67 $\pm$ 1.2        | S                              |
| TUN-4                         | 1.33 $\pm$ 0.5        | S                              |
| TUN-5                         | 2.50 $\pm$ 0.6        | S                              |
| TUN-7                         | 2.80 $\pm$ 0.8        | S                              |
| TUN-8                         | 2.67 $\pm$ 1.1        | S                              |
| TUN-9*                        | -                     | -                              |
| TUN-13                        | 2.33 $\pm$ 1.5        | S                              |
| TUN-16                        | <b>0.83</b> $\pm$ 0.6 | <b>R</b>                       |
| TUN-18*                       | -                     | -                              |
| TUN-19                        | <b>0.67</b> $\pm$ 0.5 | <b>R</b>                       |
| TUN-24                        | 2.00 $\pm$ 1.0        | S                              |
| TUN-25                        | <b>0.83</b> $\pm$ 0.5 | <b>R</b>                       |
| TUN-26                        | 1.67 $\pm$ 0.6        | S                              |
| <b>Differential cultivars</b> |                       |                                |
| Bola de Oro                   | 4.00 $\pm$ 0.0        | S                              |
| PMR45                         | 4.00 $\pm$ 0.0        | S                              |
| Edisto47                      | 0.33 $\pm$ 0.2        | R                              |
| PMR5                          | 0.16 $\pm$ 0.1        | R                              |
| PI414723                      | 0.33 $\pm$ 0.2        | R                              |

\*Tun-9 and Tun-18 were not evaluated due to poor amounts of seeds.

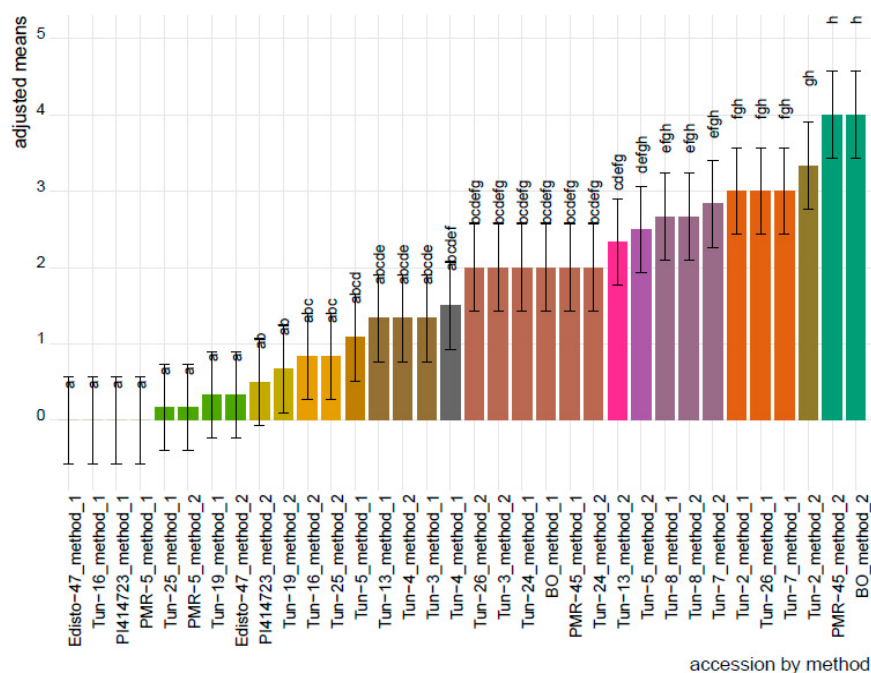

**Figure S1.** Least squares means with letters display ( $p < 0.05$ ) for the significant interaction effect between method and accession on the *P. xanthii* race 2 reaction, displaying high variation among accession/method combinations; method\_1: artificial inoculation in growth chamber and method\_2: natural infection. Means with the same letter are not significantly different (Tukey test,  $p < 0.05$ ).

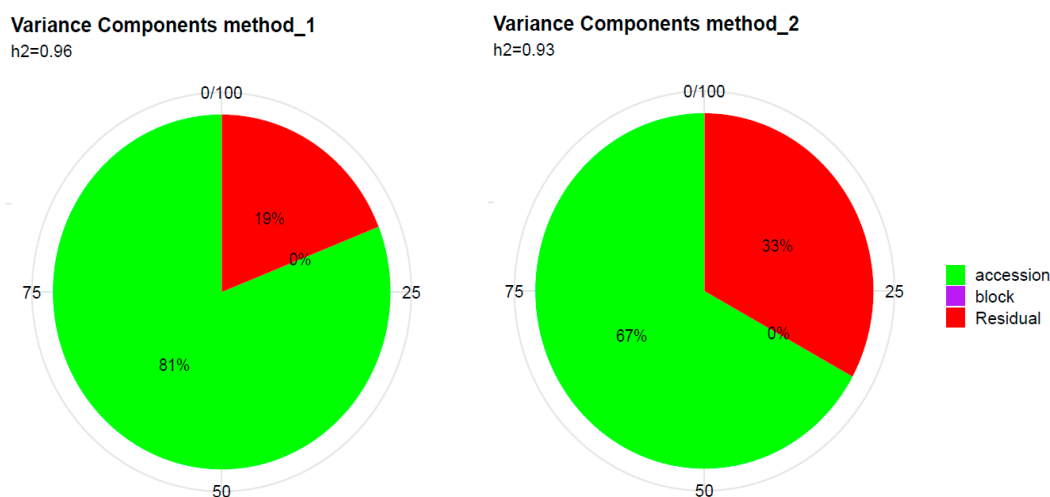

**Figure S2.** Display the extent of variance components influencing the *P. xanthii* race 2 response in each method used (method\_1: artificial inoculation in growth chamber and method\_2: natural infection).
